# Supplementary material for: Sensitive and selective colorimetric nitrite ion assay using silver nanoparticles easily synthesized and stabilized by AHNDMS and functionalized with PABA
Source: Royal Society of Chemistry journal article supplement (doi:10.1039/c8na00146d), 2018-12-24
Supplement: c8na00146d1.pdf [file c8na00146d1.pdf]

## Supporting Information

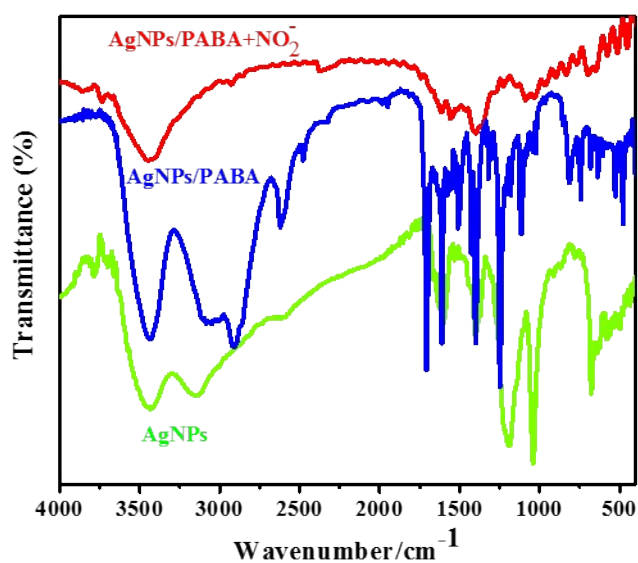

Fig. S1 illustration of IR spectra of AgNPs (green color), AgNPs/PABA (blue color), and AgNPs/PABA+NO<sub>2</sub><sup>-</sup> (red color).

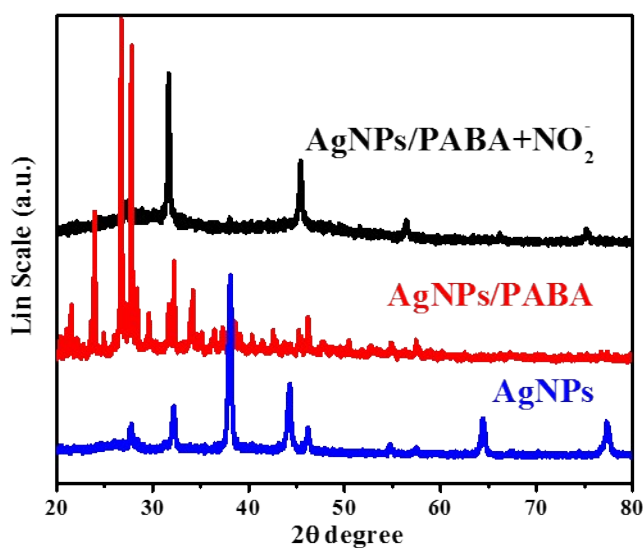

Fig. S2 illustration of XRD spectra of AgNPs (green color), AgNPs/PABA (blue color), and AgNPs/PABA+NO<sub>2</sub><sup>-</sup> (red color).

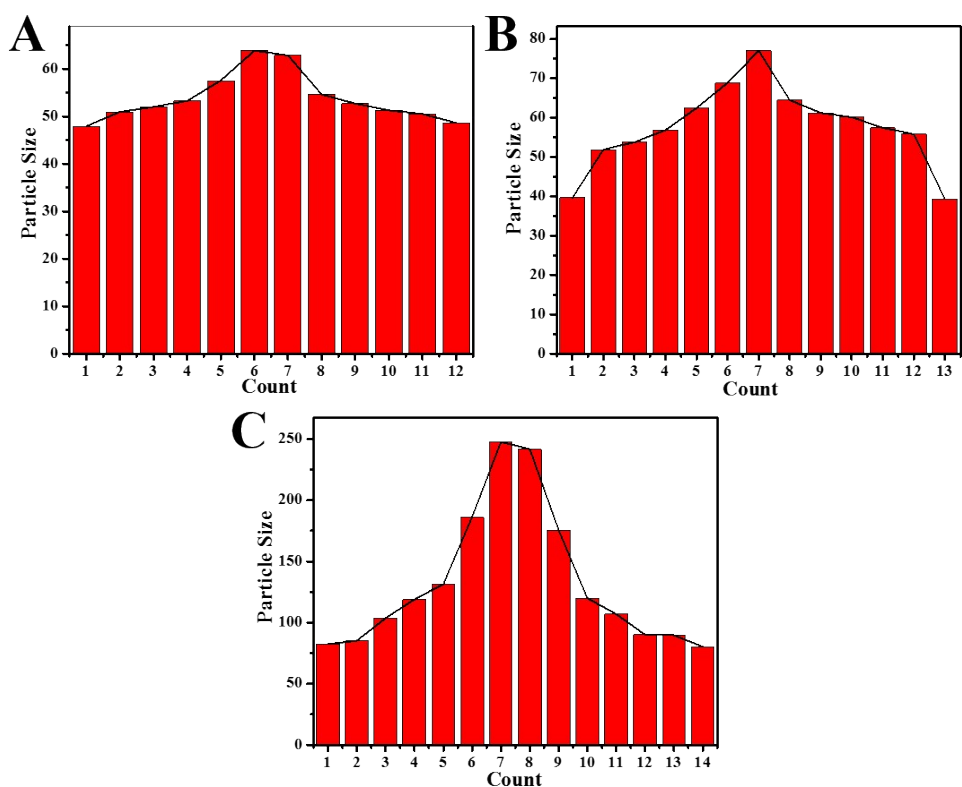

Fig. S3 Particle size calculation of AgNPs synthesized and stabilized by AHNDMS (A), Particle size calculation of AgNPs functionalized with PABA (B), Particle size calculation of aggregated AgNPs because of the presence of  $\text{NO}_2^-$  (C).

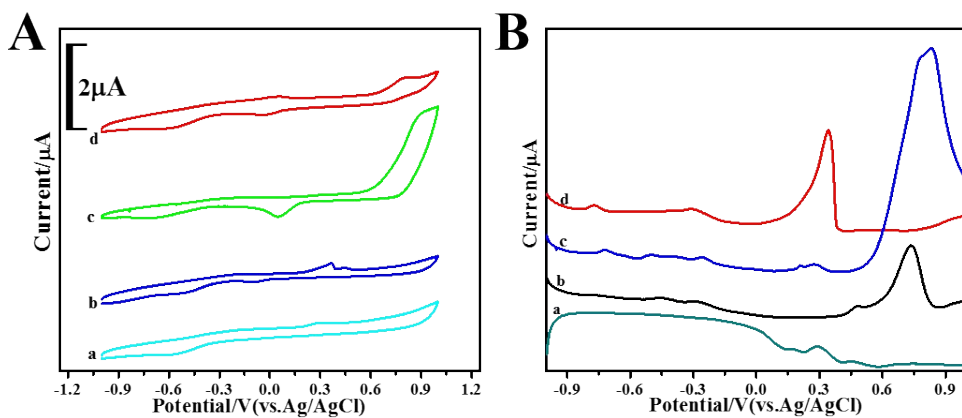

Fig. S4 (A) Cyclic voltammetry of pure AHNDMS (a), AgNPs synthesized and stabilized by AHNDMS (b), AgNPs functionalized with PABA (c) and aggregated AgNPs because of the presence of  $\text{NO}_2^-$  (d). (B) Differential pulse voltammetry of pure AHNDMS (a), AgNPs synthesized and stabilized by AHNDMS (b), AgNPs functionalized with PABA (c) and aggregated AgNPs because of the presence of  $\text{NO}_2^-$  (d).

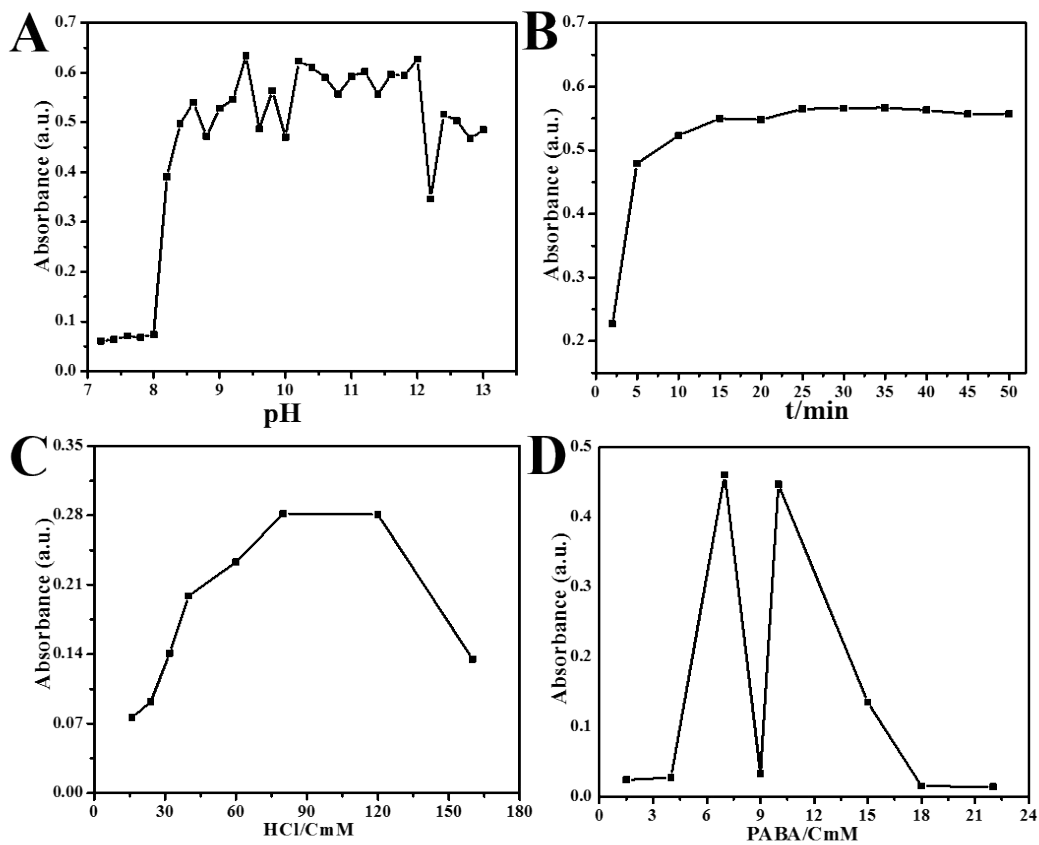

**Fig. S5** illustration of optimizing condition of the proposed method (A) effect of different pH solutions, (B) effect of time, (C) effect of PABA concentration and (D) effect of hydrochloric acid concentration.
